# Supplementary material for: Tuning the distribution of Al atoms in the framework of beta zeolites and its impact on the alkylation of phenol
Source: Royal Society of Chemistry journal article supplement (doi:10.1039/d5ta07655b), 2026-01-01
Supplement: d5ta07655b1.pdf [file d5ta07655b1.pdf]

## Supporting Information

### **Tuning the distribution of Al atoms in the framework of Beta zeolite and impact on the alkylation of phenol**

**Zhuo Zhang<sup>a</sup>, Huoyan Jiang<sup>a</sup>, Yi Huang<sup>c</sup>, Baoyu Liu<sup>\*,a,b</sup>**

<sup>a</sup>School of Chemical Engineering and Light Industry, Guangdong University of Technology, Guangzhou, 510006,  
P.R. China

<sup>b</sup>Guangdong Provincial Laboratory of Chemistry and Fine Chemical Engineering Jieyang Center, Jieyang 515200,  
China

<sup>c</sup>School of Engineering, Institute for Materials & Processes, the University of Edinburgh, Edinburgh EH9 3FB,  
United Kingdom

#### **Table of Contents**

---

\* Corresponding author, Email: [baoyu.liu@gdut.edu.cn](mailto:baoyu.liu@gdut.edu.cn) (Baoyu Liu)

|    |                                                                                                     |     |
|----|-----------------------------------------------------------------------------------------------------|-----|
| 1  |                                                                                                     |     |
| 2  | <b>Experimental Procedures</b> .....                                                                | S3  |
| 3  | <b>Materials</b> .....                                                                              | S3  |
| 4  | <b>Catalyst characterization</b> .....                                                              | S3  |
| 5  | <b>Catalytic tests</b> .....                                                                        | S4  |
| 6  | <b>Figures and Tables</b> .....                                                                     | S6  |
| 7  | <b>Figure S1.</b> SEM images of Beta-H (a and b), Beta-C (c and d), Beta-N (e and f). .....         | S6  |
| 8  | <b>Figure S2.</b> Nitrogen adsorption-desorption isotherms of the obtained Beta zeolites. ....      | S6  |
| 9  | <b>Figure S3.</b> UV-vis spectra of different dehydrated Co-Beta zeolites. ....                     | S7  |
| 10 | <b>Figure S4.</b> Representation of Beta zeolite framework in the [010] axis with nine different T- |     |
| 11 | sites substituted by Al <sup>3+</sup> ion (Si yellow, Al red, O blue, H white). ....                | S7  |
| 12 | <b>Figure S5.</b> Product distributions with time-on-stream over (a) Beta-H, (b) Beta-C and (c)     |     |
| 13 | Beta-N, respectively. ....                                                                          | S8  |
| 14 | <b>Figure S6.</b> Thermogravimetric (TG) curves of various spent Beta zeolites. ....                | S9  |
| 15 | <b>Figure S7.</b> Quantitative relationship between concentrations of different aluminum species    |     |
| 16 | and Brønsted acid sites (BAS) and phenol conversion(all provided data were evaluated at 353         |     |
| 17 | K and 1 h, with a ratio of phenol and <i>tert</i> -butanol to 2:1 ) .....                           | S9  |
| 18 | <b>Table S1.</b> Acid density of Beta zeolite catalysts.....                                        | S10 |
| 19 | <b>Table S2.</b> The distribution of Brønsted acid sites in Beta zeolites .....                     | S10 |
| 20 | <b>Table S3.</b> Coke deposit of resultant Beta zeolites. ....                                      | S10 |
| 21 | <b>References</b> .....                                                                             | S11 |
| 22 |                                                                                                     |     |
| 23 |                                                                                                     |     |
| 24 |                                                                                                     |     |
| 25 |                                                                                                     |     |

## 1 **Experimental Procedures**

### 2 **Materials**

3       The chemical reagents used in present research involve JN-30 silica sol (30 wt%,  
4 Qingdao Haiwan Chemical Co., Ltd), sodium aluminate (53 wt%  $\text{Al}_2\text{O}_3$ , 42 wt%  $\text{Na}_2\text{O}$ ,  
5 Macklin), Tetraethylammonium hydroxide (TEAOH, 35 wt%, Macklin),  
6 Tetraethylammonium chloride (TEACl, 98%, Macklin), Tetraethylammonium nitrate  
7 ( $\text{TEANO}_3$ , 98%, Macklin), sodium hydroxide (NaOH, 96%, Macklin), ammonium  
8 chloride ( $\text{NH}_4\text{Cl}$ , 99 wt%, Tianjin Damao Chemical Reagent Co.), cobaltous nitrate  
9 ( $\text{Co}(\text{NO}_3)_2 \cdot 6\text{H}_2\text{O}$ , 99 wt%, Macklin), phenol (99.5%, Macklin), *tert*-butanol (AR,  
10 Macklin), n-dodecane (AR, Macklin), cyclohexane (AR, Macklin), pyridine (AR,  
11 Macklin), 2,4,6-trimethylpyridine (AR, Macklin), deionized water.

### 12 **Catalyst characterization**

13       The crystal structures of prepared zeolites were characterized by X-ray diffraction  
14 (XRD) analyzer that was conducted on a Bruker-AXS D2 PHASER Advance  
15 diffractometer with Cu  $K\alpha$  radiation. The morphology of the zeolites was observed by  
16 a TDCLS-4800 scanning electron microscope (SEM). The amounts of silicon,  
17 aluminum and cobalt in the zeolite materials were determined by inductively coupled  
18 plasma optical emission spectroscopy (ICP-OES). The textural parameters of Beta  
19 zeolites were measured by Micromeritics ASAP 2460 devices at 77 K, and zeolites  
20 were pretreated under the condition of 473 K and vacuum for 6 h. The total surface area  
21 of the resultant samples was determined by the Brunauer-Emmett-Teller (BET) model,  
22 while the pore size distribution was obtained by the Barrett-Joyner-Halenda (BJH)  
23 model based on  $\text{N}_2$  desorption isotherm. The total density of acid sites was determined  
24 by Fourier transform infrared spectroscopy with the probe molecules of pyridine, using  
25 a Bruker VERTEX 70 spectrometer. The zeolites were firstly degassed at 723 K for 2  
26 h before the measurements, then pyridine was adsorbed on the zeolites for 0.5 h at 298  
27 K. Secondly, the temperature was raised to 423 K at 1 h to remove the weakly bound  
28 pyridine molecules. Thirdly, the acid density of resultant zeolites was measured by  
29 infrared spectroscopy at 32 scans and a resolution of  $2\text{ cm}^{-1}$  when these samples were  
30 cooled to 298 K. In the Py-IR spectra, the characteristic peak of Brønsted acid and

1 Lewis acid sites for zeolite are at  $1545\text{ cm}^{-1}$  and  $1455\text{ cm}^{-1}$ , respectively. The molar  
2 extinction coefficient of  $2.22\text{ cm } \mu\text{mol}^{-1}$  and  $1.67\text{ cm } \mu\text{mol}^{-1}$  were used to calculate the  
3 density of Brønsted acid sites and Lewis acid sites, respectively. In the FT-IR spectra  
4 of adsorbed 2,4,6-trimethylpyridine, the characteristic peak of Brønsted acid sites is at  
5  $1636\text{ cm}^{-1}$ , corresponding to a molar extinction coefficient of  $10.1\text{ cm } \mu\text{mol}^{-1}$ .<sup>1, 2</sup> In  
6 addition, the acidity of obtained samples were also measured by temperature  
7 programmed desorption of ammonia ( $\text{NH}_3$ -TPD) on an AutoChem 2920 instrument  
8 equipped with a thermal conductivity detector (TCD). The high-resolution  $^{27}\text{Al}$  MAS  
9 NMR characterizations were performed to determine the Al coordination environment  
10 on a Bruker Avance Neo 400WB spectrometer equipped at a resonance frequency of  
11  $104.3\text{ MHz}$ . The measurements were performed on non-hydrated samples using a pulse  
12 length of  $3.84\text{ }\mu\text{s}$  and a power of  $95.91\text{ W}$ . The spectral data were fitted and analyzed  
13 using the Mastrenova.<sup>15</sup> Diffuse reflectance ultraviolet-visible (UV-vis) spectra of the  
14 dehydrated Co-Beta-H, Co-Beta-C, and Co-Beta-N samples were measured against  
15  $\text{BaSO}_4$  in the range of  $200\text{-}600\text{ nm}$  on a Shimadzu UV3700i spectrometer. Before each  
16 measurement, the hydrated Co-Beta-X samples were dehydrated for  $3\text{ h}$  at  $10^{-1}\text{ Pa}$  and  
17  $723\text{ K}$  in order to eliminate the influence of divalent cobalt species with  $\text{H}_2\text{O}$  or  
18 hydroxyl groups.<sup>3</sup>

## 19 **Catalytic tests**

20 The catalytic performances of resultant Beta zeolites in the alkylation of phenol  
21 with *tert*-butanol were evaluated in a three-necked round-bottom flask under  
22 atmospheric pressure at  $353\text{ K}$ . In a typical reaction,  $0.2\text{ g}$  of zeolite was employed, the  
23 molar ratio of phenol and *tert*-butanol was  $1:2$ . Specially, the cyclohexane was served  
24 as the solvent, while *n*-dodecane was functioned as the internal standard substance. The  
25 reaction mixture was periodically taken and analyzed by gas chromatograph equipped  
26 with an HP-5 column and a flame ionization detector.

27 Subsequently, their stability and lifetime were further investigated through a fixed-  
28 bed reactor, and a  $10\text{ mm}$  diameter reactor tube was used. The reaction was carried out  
29 under atmospheric pressure at  $413\text{ K}$ . All Beta zeolite catalysts were pelletized to a size  
30 of  $20\text{-}40$  mesh and activated at  $673\text{ K}$  for  $4\text{ h}$  prior to testing. The molar ratio of phenol

1 to *tert*-butanol was 1:2 and a total weight hourly space velocity (WHSV) was 5 h<sup>-1</sup>,  
 2 these products were collected every 2 h and analyzed by gas chromatography as  
 3 mentioned above. Prior to testing, all Beta zeolites were ion-exchanged three times at  
 4 353 K for 12 h, using 1.0 mol L<sup>-1</sup> NH<sub>4</sub>Cl aqueous solution, and these Beta zeolites were  
 5 transformed into H<sup>+</sup> form.<sup>4</sup> The conversion of phenol and the selectivity of 4-TBP were  
 6 calculated according to specific formulas<sup>2</sup>:

$$\text{Conversion of Phenol} = \left(1 - \frac{C_A}{C_{A,0}}\right) \times 100\% \quad (1)$$

$$\text{Selectivity of 4-TBP} = \left(\frac{n_{4-TBP}}{n_{TBPE} + n_{2-TBP} + n_{4-TBP} + n_{2,4-DTBP} + n_{2,6-DTBP} + n_{2,4,6-TTBP}}\right) \times 100\% \quad (2)$$

8  
 9 where  $C_{A,0}$  is the initial concentration of phenol in the mixtures (mmol L<sup>-1</sup>) and  $C_A$  is  
 10 the concentration of phenol after reaction at a certain moment (mmol L<sup>-1</sup>). The  $n_{TBPE}$ ,  
 11  $n_{4-TBP}$ ,  $n_{2-TBP}$ ,  $n_{2,4-DTBP}$ ,  $n_{2,6-DTBP}$  and  $n_{2,4,6-TTBP}$  are the molar amounts of TBPE(*tert*-butyl  
 12 phenyl ether), 4-TBP (4-*tert*-butyl phenol), 2-TBP (2-*tert*-butyl phenol), 2,4-DTBP  
 13 (2,4-Di-*tert*-butyl phenol) 2,6-DTBP (2,6-Di-*tert*-butyl phenol) and 2,4,6-TTBP (2,4,6-  
 14 tri-*tert*-butyl phenol) in the reaction mixture, respectively.

1

2 **Figures and Tables**

3

4

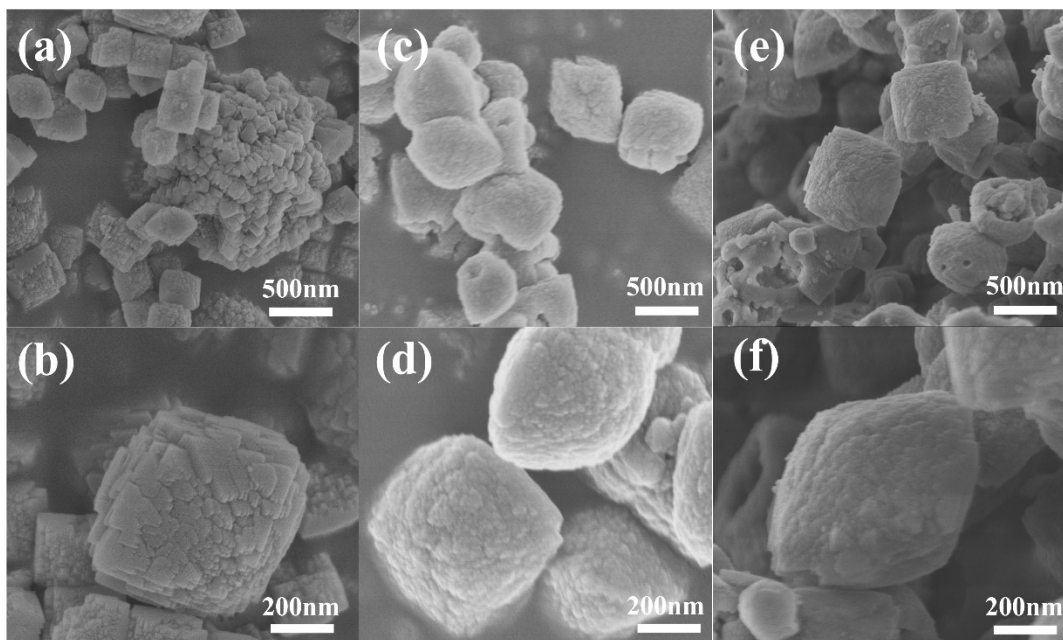

5

6 **Figure S1.** SEM images of Beta-H (a and b), Beta-C (c and d), Beta-N (e and f).

7

8

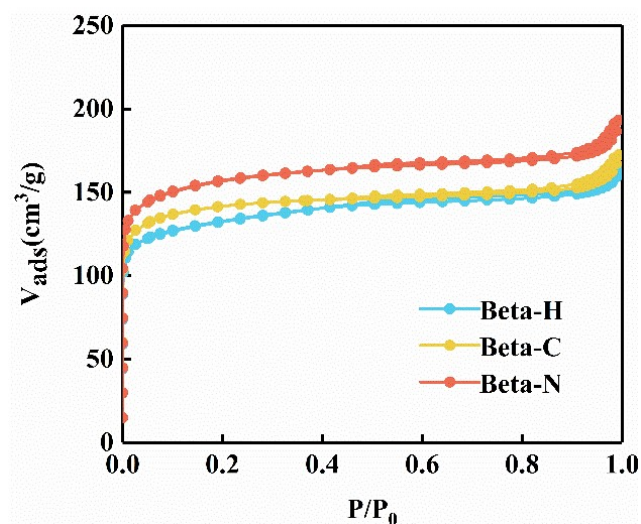

9

10 **Figure S2.** Nitrogen adsorption-desorption isotherms of the obtained Beta zeolites.

11

12

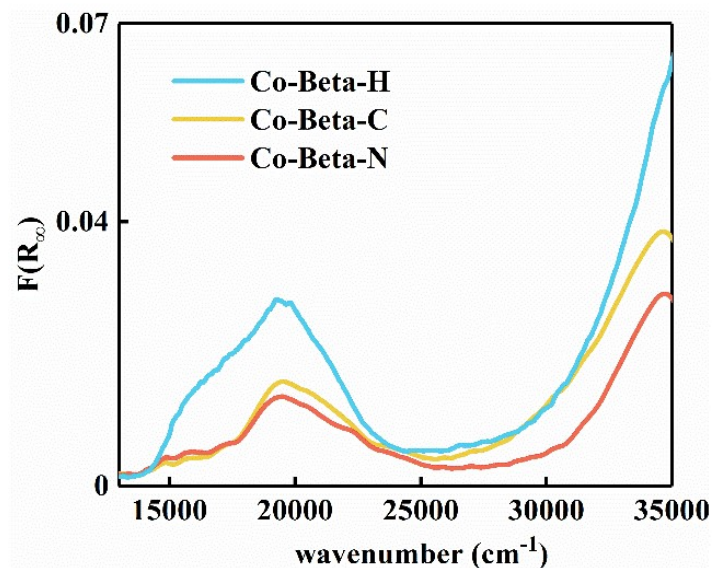

**Figure S3.** UV-vis spectra of different dehydrated Co-Beta zeolites.

**Note:** The absorption intensity is calculated by the Schuster Kubelka Munk equation<sup>5, 6</sup>,  $F(R_{\infty}) = (1-R_{\infty})^2/2R_{\infty}$ .

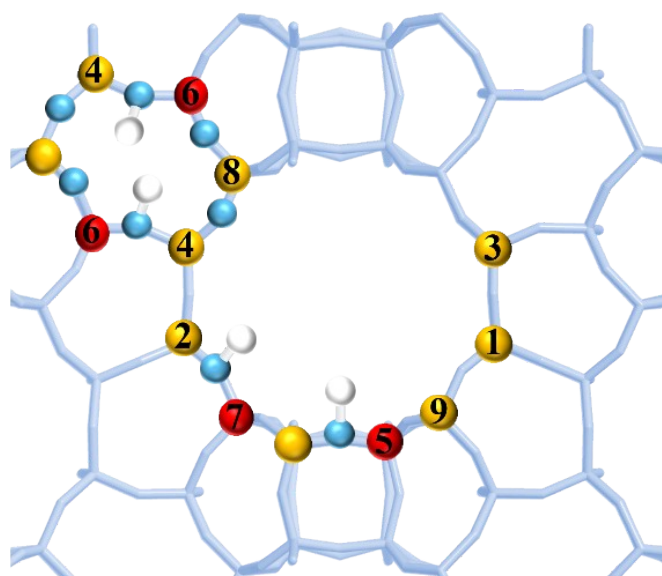

**Figure S4.** Representation of Beta zeolite framework in the [010] axis with nine different T-sites substituted by  $\text{Al}^{3+}$  ion (Si yellow, Al red, O blue, H white).

1

2

3

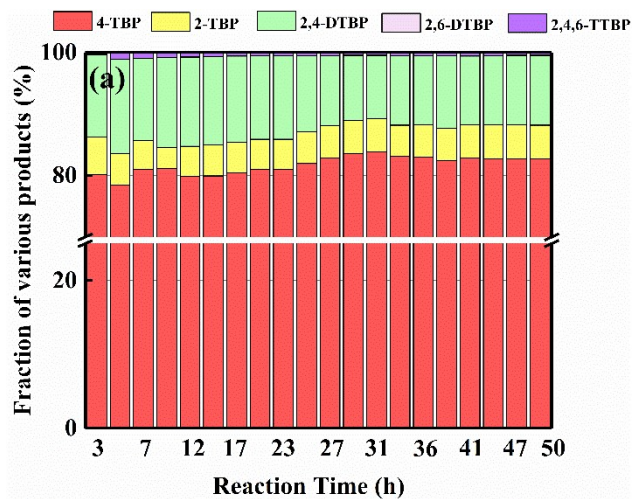

4

5

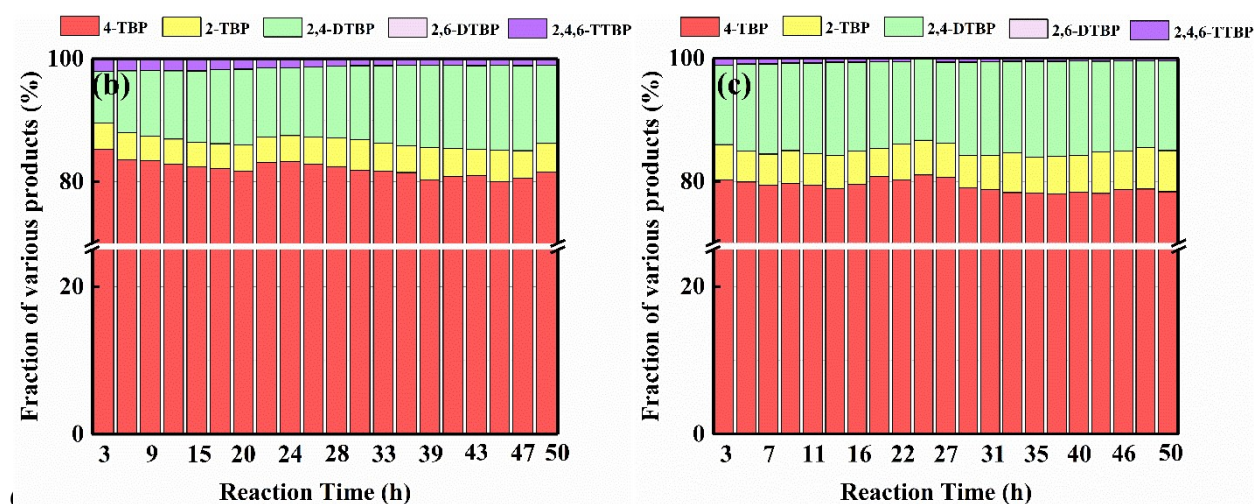

6

7 **Figure S5.** Product distributions with time-on-stream over (a) Beta-H, (b) Beta-C and (c) Beta-N,  
 8 respectively.

8

9

10

11

12

13

14



1

2

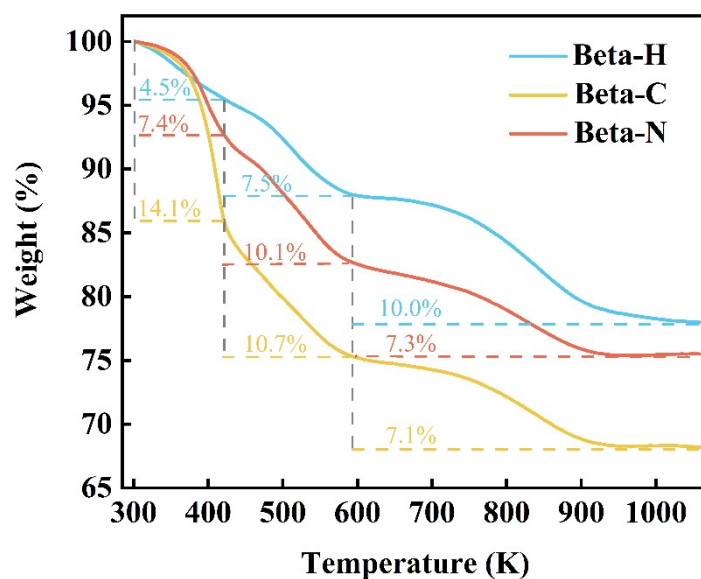

3

4

**Figure S6.** Thermogravimetric (TG) curves of various spent Beta zeolites.

5

6

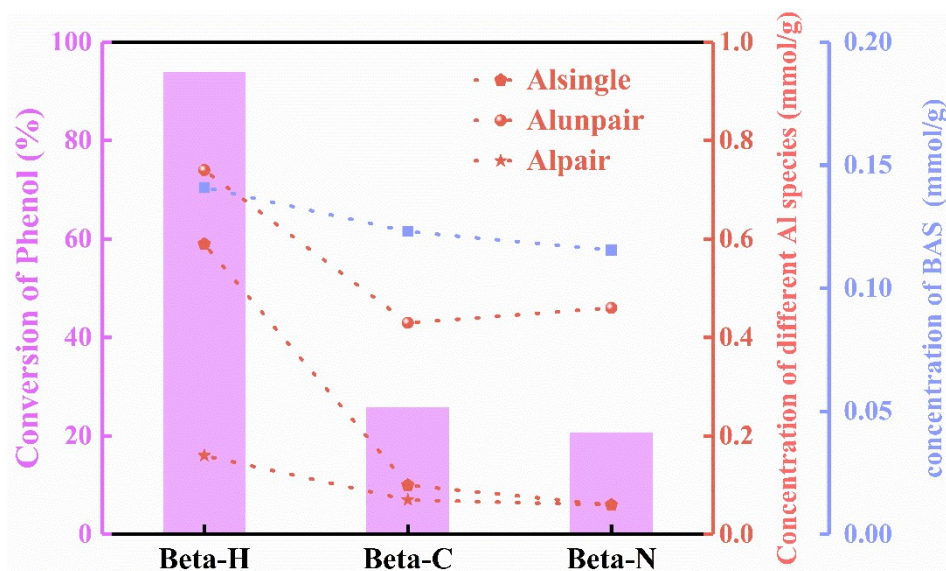

7

8

9

**Figure S7.** Quantitative relationship between concentrations of different aluminum species and Brønsted acid sites (BAS) and phenol conversion(all provided data were evaluated at 353 K and 1 h, with a ratio of phenol and *tert*-butanol to 2:1 )

10

11

12

**Table S1.** Acid density of Beta zeolite catalysts

| Catalyst | Acidity <sup>a</sup> (mmol g <sup>-1</sup> ) |                                |                               |
|----------|----------------------------------------------|--------------------------------|-------------------------------|
|          | Weak acid sites <sup>b</sup>                 | Strong acid sites <sup>c</sup> | Total acid sites <sup>d</sup> |
| Beta-H   | 1.18                                         | 0.72                           | 1.90                          |
| Beta-C   | 0.92                                         | 0.49                           | 1.41                          |
| Beta-N   | 0.93                                         | 0.46                           | 1.39                          |

<sup>a</sup> Measured by NH<sub>3</sub>-TPD.<sup>b</sup> The density of weak acid sites are measured at 323–543 K.<sup>c</sup> The density of strong acid sites are measured at 543–873 K.<sup>d</sup> The total density of acid sites = the density of weak acid sites + the density of strong acid sites.**Table S2.** The distribution of Brønsted acid sites in Beta zeolites

| Catalyst | B <sub>total</sub> <sup>a</sup><br>(mmol g <sup>-1</sup> ) | B <sub>a&amp;b</sub> <sup>b</sup><br>(mmol g <sup>-1</sup> ) | B <sub>c</sub> <sup>c</sup><br>(mmol g <sup>-1</sup> ) | B <sub>a&amp;b</sub> /B <sub>total</sub> (%) |
|----------|------------------------------------------------------------|--------------------------------------------------------------|--------------------------------------------------------|----------------------------------------------|
| Beta-H   | 0.141                                                      | 0.107                                                        | 0.034                                                  | 76                                           |
| Beta-C   | 0.123                                                      | 0.073                                                        | 0.050                                                  | 59                                           |
| Beta-N   | 0.116                                                      | 0.058                                                        | 0.058                                                  | 50                                           |

<sup>a</sup> The concentration of total Brønsted acid sites is measured by the Py-IR spectra.<sup>b</sup> The concentration of Brønsted acid sites in the channels along the *a* and *b* axis is determined by FT-IR spectra of adsorbed 2,4,6-trimethylpyridine.<sup>c</sup> The concentration of Brønsted acid sites in the channel along the *c* axis is calculated by B<sub>c</sub> = B<sub>total</sub> - B<sub>a&b</sub>.

**Note:** Pyridine molecules can enter into all channels of Beta zeolite along the *a*, *b* and *c* axis to determine the total Brønsted acid sites of catalysts, while the 2,4,6-trimethylpyridine with a size of 6.2 × 5.6 Å can only access the pore channels along the *a* and *b* axis.

**Table S3.** Coke deposit of resultant Beta zeolites.

| Catalyst | sample<br>weight (mg) | soft coke <sup>a</sup><br>(g/g <sup>0</sup> cat)×10 <sup>-2</sup> | hard coke <sup>b</sup><br>(g/g <sup>0</sup> cat)×10 <sup>-2</sup> | Average coke rate <sup>c</sup><br>(mg/g <sup>0</sup> .h <sup>-1</sup> cat) |
|----------|-----------------------|-------------------------------------------------------------------|-------------------------------------------------------------------|----------------------------------------------------------------------------|
| Beta-H   | 4.5                   | 7.5                                                               | 10.0                                                              | 2.56                                                                       |
| Beta-C   | 5.3                   | 10.7                                                              | 7.1                                                               | 2.09                                                                       |
| Beta-N   | 4.6                   | 10.1                                                              | 7.3                                                               | 1.95                                                                       |

<sup>a</sup> The weight loss from 423 to 593 K.<sup>b</sup> The weight loss from 593 to 1073 K.<sup>c</sup> Average coke rate = the weight of hard coke/time.

1

## 2 References

- 3 (1) Huang, Y. Q.; Wang, M. N.; Huang, Y.; Shang, J.; Liu, B. Y. Mesoporous Beta zeolites with  
4 controlled distribution of Brnsted acid sites for alkylation of benzene with cyclohexene.  
5 *Results. Eng.*, **2023**, 19,101377.
- 6 (2) Jiang, H. Y.; Zhang, Z.; Li, X.; Zeng, X. X.; Pu, T.; Liu, B. Y. Selective alkylation of phenol  
7 and *tert*-butanol using Zr-containing Beta zeolite. *J. Mater. Chem. A*, **2025**, 13, 7882-7891.
- 8 (3) Sazama, P.; Tabor, E.; Klein, P.; Wichterlová, B.; Sklenak, S.; Mokrzycki, L.; Pashkkova,  
9 V.; Ogura, M.; Dědeček, J. Al-rich beta zeolites. Distribution of Al atoms in the framework  
10 and related protonic and metal-ion species. *J. Catal.*, **2016**, 333, 102-114.
- 11 (4) Liu, B. Y.; Zhang, J. W.; Huang, Y. Q.; Xiong, F.; Luo, R. C. Defect-designed ZSM-12  
12 zeolites for alkylation of phenol with *tert*-butyl alcohol. *Mol. Catal.*, **2022**, 519, 112144.
- 13 (5) Dědeček, J.; Čapek, L.; Kaucký, D.; Sobalík, Z.; Wichterlová, B. Siting and Distribution of  
14 the Co Ions in Beta Zeolite: A UV–Vis–NIR and FTIR Study. *J. Catal.*, **2002**, 211, 198-  
15 207.
- 16 (6) Čapek, L.; Dědeček, J.; Sazama, P.; Wichterlová, B. The decisive role of the distribution of  
17 Al in the framework of beta zeolites on the structure and activity of Co ion species in  
18 propane-SCR-NO<sub>x</sub> in the presence of water vapour. *J. Catal.*, **2010**, 272, 44-54.
- 19
